# Supplementary material for: Impact of Roux-en-Y Gastric Bypass on Mitochondrial Biogenesis and Dynamics in Leukocytes of Obese Women
Source: MDPI journal article supplement (doi:10.3390/antiox11071302), 2022-06-29
Supplement: s1 [file s1]

**Table S1: Detailed information of all the antibodies used.**

| <b>Protein</b>  | <b>Clone</b>                                                                                                                                     | <b>Peptide / Inmunogen</b>                                                                                                  |
|-----------------|--------------------------------------------------------------------------------------------------------------------------------------------------|-----------------------------------------------------------------------------------------------------------------------------|
| <b>OPA1</b>     | 1OPA-1A8                                                                                                                                         | Recombinant protein corresponding to mouse OPA1                                                                             |
| <b>MFN1</b>     | Polyclonal                                                                                                                                       | KLH-conjugated linear peptide corresponding to the cytoplasmic domain of human Mitofusin-1                                  |
| <b>MNF2</b>     | Polyclonal                                                                                                                                       | KLH-conjugated linear peptide corresponding to the cytoplasmic domain of human Mitofusin-2                                  |
| <b>FIS1</b>     | Polyclonal                                                                                                                                       | KLH-conjugated-linear peptide corresponding to the cytoplasmic topological domain of human Mitochondrial fission 1 protein. |
| <b>OXPHOS</b>   | Monoclonal                                                                                                                                       | NA                                                                                                                          |
| <b>MIEAP</b>    | EPR13704                                                                                                                                         | Recombinant fragment within Human Spata18 aa 100-250                                                                        |
| <b>PGC1a</b>    | Polyclonal                                                                                                                                       | Synthetic peptide corresponding to Human PGC1 alpha + beta aa 750-850                                                       |
| <b>MCP1</b>     | Polyclonal                                                                                                                                       | NA                                                                                                                          |
| <b>pDRP1</b>    | Monoclonal                                                                                                                                       | NA                                                                                                                          |
| <b>mtTFA</b>    | Monoclonal                                                                                                                                       | NA                                                                                                                          |
| <b>NFKB</b>     | 2A12A7                                                                                                                                           | Recombinant protein (~175 amino acids) from the C-terminal portion of human NF-kappa-B (p65)                                |
| <b>GPX1</b>     | Polyclonal                                                                                                                                       | Synthetic peptide corresponding to a region within amino acids 127 and 203 of Human GPX1                                    |
| <b>Actin Rb</b> | Polyclonal                                                                                                                                       | N-terminal actin peptide attached to a multiple antigen peptide (MAP) backbone.                                             |
| <b>Actin Ms</b> | Monoclonal antibody is produced by immunizing animals with a synthetic peptide corresponding to amino-terminal residues of human $\beta$ -actin. | NA                                                                                                                          |
| <b>VDAC</b>     | 20B12AF2                                                                                                                                         | Recombinant full length protein. This information is proprietary to Abcam and/or its suppliers.                             |

NA, not available
